# Supplementary material for: Commiphora wildii Merxm. Essential Oil: Natural Heptane Source and Co-Product Valorization
Source: MDPI journal article supplement (doi:10.3390/molecules28020891), 2023-01-16
Supplement: s1 [file s1]

## Supplementary materials

**Table S1.** Chemical composition of *C. wildii* essential oil

| Compounds                      | RI exp          | RI theo        | % GC        |
|--------------------------------|-----------------|----------------|-------------|
| Unknown                        | 677             | -              | 0.2         |
| <b>Heptane</b>                 | 702             | 700            | <b>29.5</b> |
| Methyl Isobutyl Ketone         | 735             | 738            | tr          |
| 2-Methylheptane                | 757             | 765            | tr          |
| Toluene                        | 763             | 760            | 0.1         |
| Octane                         | 800             | 800            | 0.3         |
| 2,4-Octadiene                  | 805             | 815            | tr          |
| <i>p</i> -Xylene               | 867             | 866            | tr          |
| 4-Heptanone                    | 870             | 869            | tr          |
| Compounds                      | Experimental RI | Theoretical RI | %           |
| 3-Heptanone                    | 886             | 887            | 0.1         |
| 2-Heptanone                    | 891             | 890-895        | 0.1         |
| Nonane                         | 900             | 900            | 0.9         |
| 4-Heptanol                     | 897             | -              | 0.1         |
| 3-Heptanol                     | 903             | 892            | 0.1         |
| 2-Heptanol                     | 907             | 900            | 0.1         |
| Unknown                        | 918             | -              | 0.1         |
| Tricyclene                     | 920             | 925            | 0.1         |
| $\alpha$ -Thujene              | 924             | 930-933        | 3.7         |
| $\alpha$ -Pinene               | 934             | 932            | 43.4        |
| Camphene                       | 946             | 955            | 0.7         |
| 2,4-Thujadiene                 | 950             | 949-951        | 0.4         |
| Sabinene                       | 970             | 969            | 0.5         |
| $\beta$ -Pinene                | 976             | 974            | 11.0        |
| Unknown                        | 988             | -              | 0.1         |
| 2-Pentylfuran                  | 989             | 990            | 0.1         |
| $\alpha$ -Phellandrene         | 1002            | 1005-1008      | 0.1         |
| $\alpha$ -Terpinene            | 1015            | 1008           | 0.4         |
| <i>p</i> -Cymene               | 1018            | 1020           | tr          |
| Carvomenthene                  | 1021            | 1021           | tr          |
| <i>o</i> -Cymene               | 1023            | 1023           | 2.3         |
| Limonene                       | 1027            | 1024           | 1.0         |
| Eucalyptol                     | 1030            | 1031-1036      | 0.1         |
| <i>m</i> -Cymene               | 1033            | 1023-1026      | 0.1         |
| ( <i>Z</i> )- $\beta$ -Ocimene | 1035            | 1037-1038      | 0.1         |
| ( <i>E</i> )- $\beta$ -Ocimene | 1046            | 1048           | 0.2         |
| $\gamma$ -Terpinene            | 1056            | 1062           | 0.7         |
| Sabinene hydrate*              | 1072            | 1070           | 0.1         |
| $\alpha$ -Terpinolene          | 1084            | 1088           | 0.1         |
| Unknown                        | 1090            | -              | 0.1         |
| Unknown                        | 1104            | -              | 0.1         |
| $\alpha$ -Thujone              | 1106            | 1105           | tr          |
| $\gamma$ -Thujone              | 1118            | 1114           | tr          |
| Fenchol                        | 1122            | 1112           | tr          |
| $\alpha$ -Campholene aldehyde  | 1127            | 1119           | 0.1         |

| $\beta$ -pinone              | 1139            | 1142           | tr  |
|------------------------------|-----------------|----------------|-----|
| Pinocarveol                  | 1142            | 1134-1137      | 0.4 |
| Camphre                      | 1146            | 1147           | 0.2 |
| Unknown                      | 1149            | -              | 0.2 |
| Unknown                      | 1153            | -              | 0.1 |
| Pinocamphone                 | 1160            | 1154           | 0.1 |
| Unknown                      | 1162            | -              | 0.1 |
| Unknown                      | 1175            | -              | 0.2 |
| Terpinen-4-ol                | 1181            | 1174           | 0.4 |
| Myrtenal                     | 1195            | 1193-1196      | 0.1 |
| $\alpha$ -Terpineol          | 1198            | 1190           | 0.1 |
| Myrtenol                     | 1200            | 1194-1196      | 0.2 |
| Verbenone                    | 1209            | 1209           | 0.2 |
| Compounds                    | Experimental RI | Theoretical RI | %   |
| Bornyl acetate               | 1283            | 1288           | tr  |
| <i>cis</i> -Verbenyl acetate | 1290            | 1294           | tr  |
| Myrtenyl acetate             | 1323            | 1328           | tr  |
| $\beta$ -Elemene             | 1387            | 1389           | 0.1 |
| $\beta$ -Caryophyllene       | 1415            | 1417           | tr  |
| Aromadendrene                | 1434            | 1436           | tr  |
| Guaiene                      | 1485            | 1490           | tr  |
| $\alpha$ -Selinene           | 1492            | 1495           | tr  |
| $\delta$ -Cadinene           | 1516            | 1522           | tr  |
| Spathulenol                  | 1576            | 1577           | tr  |

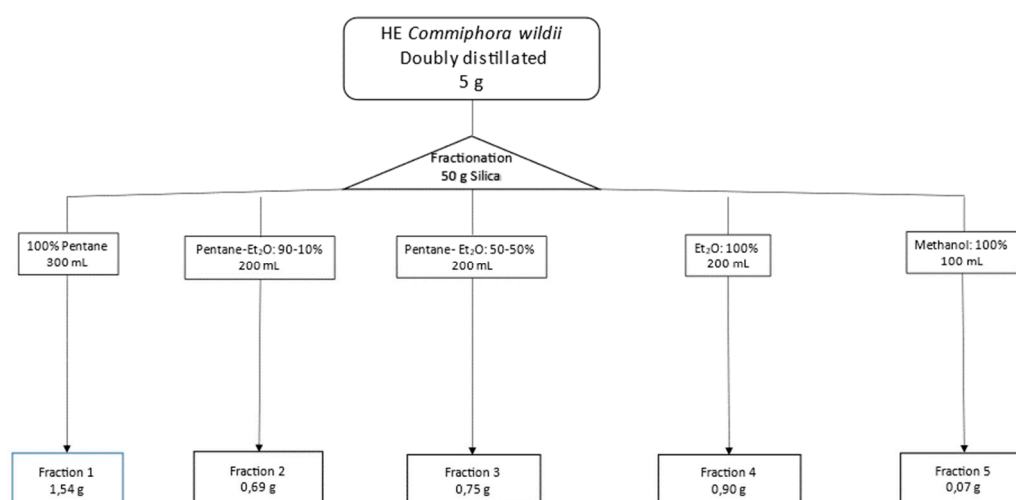

Figure S1. Fractionation protocol.

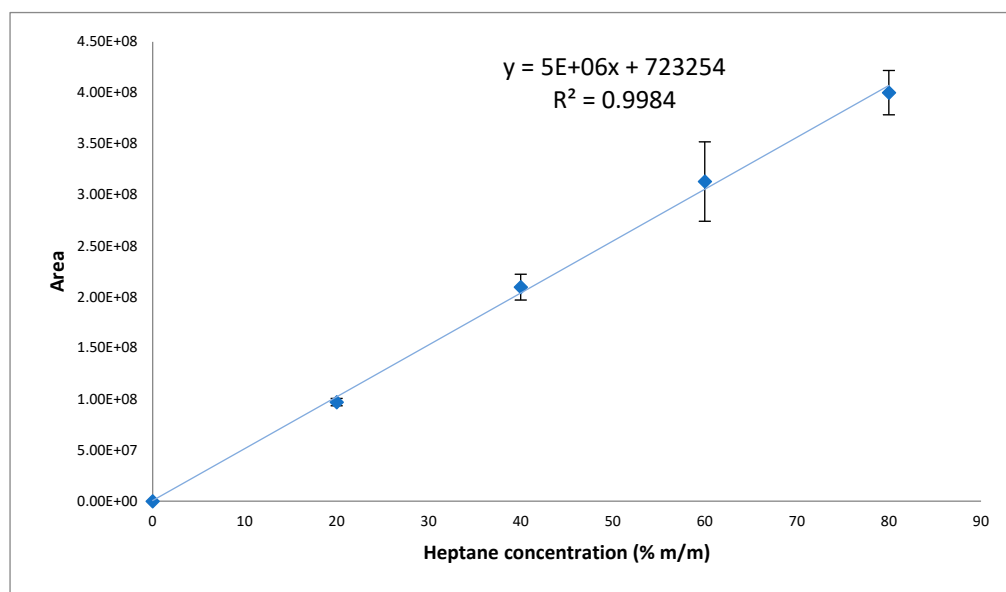

**Figure S2.** Heptane assay calibration curve.
